# Hybrid Automata Library

Rafael Bravo, Mark Robertson-Tessi, Alexander R. A. Anderson

September 10, 2018

Anderson Lab / Integrated Mathematical Oncology Department / H. Lee Moffitt  
Cancer Center & Research Institute, Tampa, Florida, USA  
rafael.bravo@moffitt.org, mark.robertsontessi@moffitt.org,  
alexander.anderson@moffitt.org

## Abstract

The Hybrid Automata Library (HAL) is a Java Library made of simple, efficient, generic components that can be used to model complex spatial systems. HAL's components can broadly be classified into: on- and off-lattice agent containers, finite difference diffusion fields, a Gui building system, and additional tools and utilities for computation and data collection. These components are designed to operate independently and are standardized to make them easy to interface with one another. As a demonstration of how modeling can be simplified using our approach, we have included a complete example of a hybrid model (a spatial model with interacting agent-based and PDE components, commonly used for oncology modeling). HAL is a useful asset for researchers who wish to build efficient 1D, 2D and 3D hybrid models in Java, while not starting entirely from scratch. It is available on github at <https://github.com/torococo/HAL> under the MIT License. HAL requires at least Java 8 or later to run, and the java jdk version 1.8 or later to compile the source code.

## 1 Author Summary

In this paper we introduce the Hybrid Automata Library (HAL) with the purpose of simplifying the implementation and sharing of hybrid models for use in mathematical oncology. Hybrid modeling is used in oncology to create spatial models of tissue, typically by modeling cells using agent-based techniques, and by modeling diffusible chemicals using partial differential equations (PDEs). HAL's key components are designed to run agent-based models, PDEs, and visualization. The components are standardized and are completely decoupled, so models can be built with any combination of them. We first explore the philosophy behind HAL, then summarize the components. Lastly we demonstrate how the components work together with an example of a hybrid model, and a walk-through of the code used to construct it. HAL is open-source, and will produce identical results on any machine that supports Java 8 and above, making it highly portable. We recommend HAL to modelers interested in spatial dynamics, even those outside of mathematical oncology, as the components are general enough to facilitate a variety of model types. A community page that provides a download link and online documentation can be found at <https://halloworld.org> [1].

## 2 Introduction

We created The Hybrid Automata Library (HAL) to address a need at the Moffitt Cancer Center Integrated Mathematical Oncology department to have a common

| Name         | Language   | Scheduling Structure   | Spatial Representations                    |
|--------------|------------|------------------------|--------------------------------------------|
| HAL          | Java       | For-Loop Iteration     | On/Off-lattice, Newtonian Physics          |
| PhysiCell    | C++        | Domain Specific        | Newtonian Physics                          |
| CompuCell 3D | Python/XML | Domain Specific        | On Lattice Composites                      |
| Chaste       | C++        | Modular Behavior Based | On/Off-lattice, Newtonian Physics, Voronoi |
| Repast       | Java       | Group-Based Scheduler  | On/Off-lattice, Network                    |
| Mason        | Java       | Agent-Level-Scheduler  | On/Off-lattice                             |
| Netlogo      | Netlogo    | Go Loop                | On/Off-lattice, Spatial Networks           |

**Table 1.** Comparison of HAL with other agent-based Modeling Frameworks commonly used in tissue modeling

framework for building efficient hybrid models. Hybrid models in oncology usually represent cells as agents and the concentrations of relevant chemicals (drugs, resources or signaling molecules) as partial differential equations (PDEs). These models can simulate local interactions between cells with complex internal dynamics and decision-making processes while also allowing cells to interact with the PDE concentration fields in their local environment. Hybrid models have been widely adopted within the Mathematical Oncology community [2–5], and whilst a number of agent-based modeling frameworks have been used for tissue modeling, including MASON, Repast, Physicell, CompuCell3D, Chaste, and Netlogo, we designed HAL to be simpler, more efficient, and easier to use.

Some of these frameworks facilitate model building under specific spatial interaction assumptions like PhysiCell [6], which treats cells as spheres that force each other apart and is optimized for large cell populations, and CompuCell 3D [7], which models cells as contiguous composites of lattice positions, allowing cell deformation. HAL does not include the same depth in the domains specific to these frameworks, but uses a broader approach to provide the capacity for modeling a variety of systems.

Some of the most popular frameworks that also take a broad approach are Chaste, Repast, Mason, and Netlogo. Chaste uses an assumption based system for model building, in which modular rules are composed to define behavior, and behaviors that are not currently represented can be added as new modules [8]. This modular approach allows for very rapid prototyping, and increases the reproducibility of results. Repast uses a hierarchical nesting approach to group agents into sets that will all execute some action, and also features a highly customizable scheduling procedure to sequence these actions [9]. MASON is probably the most architecturally similar to HAL, as it also strives to be a modular agent-based modeling package, with built-in optional visualization tools and comparatively lax structure [10]. Netlogo uses a custom scripting language in order to simplify the coding process [11]. Netlogo also provides an accessible model development environment, making it a great choice for new modelers/coders. Each of these frameworks facilitates modeling under a different centralized control structure: In Chaste centralized control is done by a Simulator object, in Repast this component is called an Engine, in Mason it is called the Schedule object, and in Netlogo it is called the Go loop 1.

HAL shares many characteristics with these frameworks, but differentiates itself with a minimal, decentralized design made up of independent building blocks that are thematically similar. There is no centralized controller or scheduler, so the modeler designs the logical flow and the scheduling of interactions between components of the model. Having no scheduler makes the model design flexible (there are no pre-set configurations, eg. when models should be visualized, when their step logic should run, when models should be created or destroyed.) These considerations have led to a lightweight framework that is easy to use, highly flexible, and effective within the scope of hybrid modeling, agent-based modeling, and the solving of simple

reaction-convection-diffusion PDEs using finite differences. 83

The main components of HAL consist of 1D, 2D and 3D Grids that hold Agents, 1D, 84  
2D and 3D finite difference PDE fields, and methods for sampling distributions, data 85  
recording, and model visualization. The assumptions behind these main components are 86  
detailed in this paper and within the manual 6. 87

HAL was designed with mathematical oncology in mind, but is general enough to 88  
facilitate modeling systems from many domains (eg. ecology [12], development, 89  
population dynamics, and network theory). [6]. We also imagine that its simplicity and 90  
explicit nature could make it a useful educational platform. Some familiarity with the 91  
Java programming language is recommended for new users. 92

## 3 Design And Implementation 93

### 3.1 Design Philosophy 94

In the next section, we discuss some of the design decisions that have driven the 95  
architecture of HAL. 96

#### 3.1.1 Language Choice 97

In designing HAL we have tried to balance an adherence to speed/memory management, 98  
simplicity/stability, and modularity. The Java language itself balances these 99  
considerations very well, making it a suitable basis for HAL. High performance 100  
languages such as C, C++, and Fortran, can be coded to run at speeds comparable to 101  
or faster than Java, however these languages require more low-level management. 102  
Moreover, they do not have the same security guarantees as they permit out-of-bounds 103  
memory accesses and memory leaks. Higher level languages, such as Python, while more 104  
flexible and syntactically intuitive than Java, are typically significantly slower. Java is 105  
also one of the most commonly used and taught programming languages today, which 106  
helps facilitate the adoption of HAL by new users. The fact that Java is cross-platform 107  
is also a plus. 108

#### 3.1.2 Modularity and Extensibility 109

As part of HAL's modular design, each framework component can function 110  
independently. This permits any number of components to be used in a single model, 111  
with the use of spatial queries to combine components, as seen in Fig 1. Modularity also 112  
allows modelers to choose the components of HAL that interest them. These 113  
components can be easily mixed and matched with other software, such as using the 114  
AgentGrids with a different PDE solver, or using the Gui and Visualization components 115  
with a different modeling system. Modularity also makes adding and testing new 116  
components more manageable and easier to test without adding bulk or heavy 117  
modifications to the core of the platform. 118

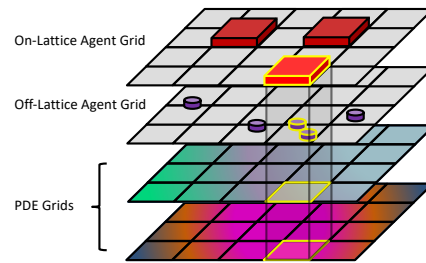

**Figure 1.** The modular design of HAL helps build complex models out of simple components. The highlighted on-lattice agent in the topmost grid searches for local overlaps with several other grids and PDEs. These overlaps can be used in a model to generate spatial interactions.

Given the incremental nature of many scientific endeavors, we also wanted to allow models and components to be extended and modified. Java's extension architecture provides an excellent environment for layered development.

As an example of the extensibility of HAL, the built-in Spherical Agent types (SphericalAgent2D, SphericalAgent3D) extend the Point Agent types (AgentPT2D, AgentPT3D). Point Agents have no built-in radius and will not collide with each other. This behavior can be useful for modeling phenomena such as the diffusion of gas particles, as visualized in Fig 2a. Spherical Agents extend Point Agents by adding an additional radius variable and velocity component variables. These properties combined with added functions for summing force vectors in response to overlap allow for a physics-based spherical model of spatial agents. This behavior can be useful for modeling tissue formation, as visualized in Fig 2b.

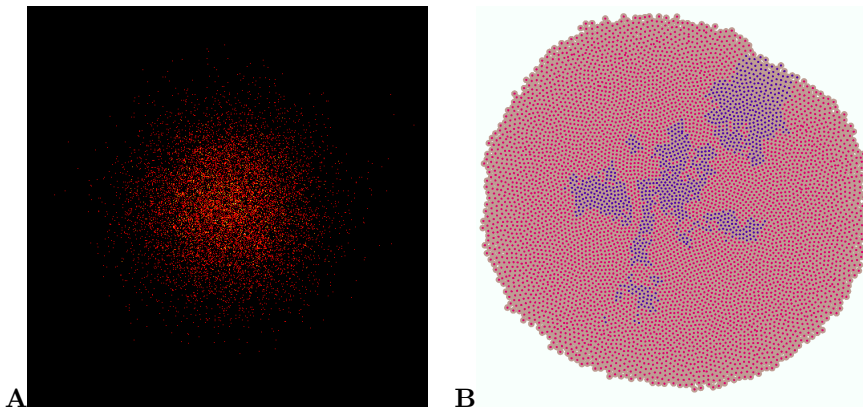

**Figure 2.** Off-lattice agent examples. **(A)** Example of 2D Point Agents modeling gas diffusion. The Point Agents move freely and cannot collide. Displayed using the GridWindow object. **(B)** Example of 2D Spherical Agents modeling growing tissue. The pink cells divide slightly more rapidly than the purple cells. Displayed using the OpenGL2DWindow object

It is also possible to extend completed models using the same approach. For example, grids and agents from published models can be used as a scaffold on which to do additional studies. This allows for followup studies to focus on implementing whatever additional assumptions and functionality they need, while leaving intact the base model code with all of its published assumptions. Subsequent papers need only

publish the additional code, making it easy for readers to understand exactly what  
additional assumptions were made on top of the prior work.

### 3.1.3 Simplicity and Stability

From the beginning, an important design principle was to make HAL simple to use  
without sacrificing performance. Simplicity makes HAL easy to learn and forces the  
components to be more generic, meaning that the same components can be applied to a  
greater variety of modeling problems. There is also a consistency to each framework  
component, such that learning to use some components is often sufficient to grasp the  
others, and makes using them in combination intuitive.

Another key design principle is stability, which is achieved in three ways:

1. By only permitting correct interaction with the components via hiding variables  
that would break the component if modified directly. For example, modelers are  
not permitted to directly modify the position properties of agents. Instead, they  
must call the provided movement functions that also update the grid position of  
the agents for future spatial queries.
2. By including checks in functions for invalid inputs. The program stops  
immediately when one of these problematic inputs occurs, allowing the user to see  
what caused the problem, rather than seeing its effects later down the line. This  
helps modelers fix bugs in the logic of their model, without having to worry about  
how these bugs interact with HAL internally.
3. By including tests for most of the algorithms that HAL uses. These tests help  
ensure confidence in the mathematics while also serving as simple tutorials to  
demonstrate the functions of most of HAL's components. HAL is also very  
shallow by design, leaving little complexity for bugs to hide in.

### 3.1.4 Speed and Memory Management

Much of the performance capability of HAL comes directly from its decentralized design.  
Having no built-in scheduler/underlying structure means that there is comparatively  
little work that the program does that the modeler is unaware of. This combined with  
the modular components and utilities allows modelers the flexibility to incorporate the  
functionality that they need, without the software sacrificing performance by implicitly  
doing unnecessary tasks.

HAL also prioritizes performance in its algorithmic implementation. HAL includes  
efficient PDE solving algorithms, such as the ADI (alternating direction implicit)  
method, and uses efficient distribution samplers rather than naive approaches. The  
integrated visualization tools are also highly efficient, using BufferedImages and  
OpenGL. Whenever possible, primitives and arrays are used to store data rather than  
classes, which takes advantage of Java's optimization for these simpler data types. Java  
is also an inherently fast language, which helps efficiently execute agent behavioral logic.

There is a memory footprint consideration with most of HAL's assets. A common  
criticism of Java applications is that they tend to use a lot of memory and are slowed  
down by Java's "garbage collector" which deletes objects that are no longer being used.  
To sidestep these memory issues, objects that are used frequently are recycled rather  
than discarded. Most functions that would use an object as part of their calculation will  
take the object as an argument rather than create a new one, which allows for reuse of  
that same object in multiple function calls. When possible, components will also store  
used objects internally for reuse in subsequent calculations. If the same function is

called many times in series with the same object argument, the reused object will be more readily accessible in the computer’s memory, further improving performance.

A key example of this reuse: when agents are removed during a simulation run, the removed agent objects are kept by the AgentGrid and will be returned again for re-initialization when a new agent is requested. Agent recycling ensures that the number of agents that the grid creates is capped to the maximum population that existed on the grid at one time.

## 3.2 Component Overview

We now move from the abstract discussion of the unifying principles behind HAL to a look at its core components in more detail. Though it may seem that learning how to use these components would be a difficult task given their number and variety, an important feature to keep in mind is that all components were designed with a consistent API, which makes changing between agent/grid types and learning their methods much easier.

### 3.2.1 AgentGrids

AgentGrids are used as spatial containers for agents. They come in 1D, 2D, 3D, and non-spatial varieties. Internally, AgentGrids are composed of two datastructures: an agent list for agent iteration, and an agent lattice for spatial queries (even off-lattice agents are stored on a lattice for quick access). The agent list can be shuffled at every iteration to randomize iteration order, and the list holds onto removed agents to facilitate object recycling. An example of the 3D capabilities of HAL is shown in Fig 3.

### 3.2.2 Agents

There are 10 base types of agent, introduced in Table 2. The SQ and PT suffixes refer to whether the agents are imagined to exist as lattice bound squares/voxels, or as non-volumetric points in space.

| Name                 | Spatial Dimension | Lattice Bound | Stackable |
|----------------------|-------------------|---------------|-----------|
| Agent0D              | 0                 | N/A           | N/A       |
| AgentSQ1D            | 1                 | yes           | yes       |
| AgentSQ1Dunstackable | 1                 | yes           | no        |
| AgentPT1D            | 1                 | no            | yes       |
| AgentSQ2D            | 2                 | yes           | yes       |
| AgentSQ2Dunstackable | 2                 | yes           | no        |
| AgentPT2D            | 2                 | no            | yes       |
| AgentSQ3D            | 3                 | yes           | yes       |
| AgentSQ3Dunstackable | 3                 | yes           | no        |
| AgentPT3D            | 3                 | no            | yes       |

**Table 2.** The 10 base agent types in HAL. The differences between them are displayed in each column. Stackable refers to whether multiple agents can exist on the same lattice position

Agent objects are always bound to a grid. In their base class form, agents keep track of their position on the grid and their age. Newly created agents are not included in the same iteration loop in which they are created, to prevent infinite loops of “runaway proliferation”. The base agent classes can be extended to include additional state properties and methods as needed.

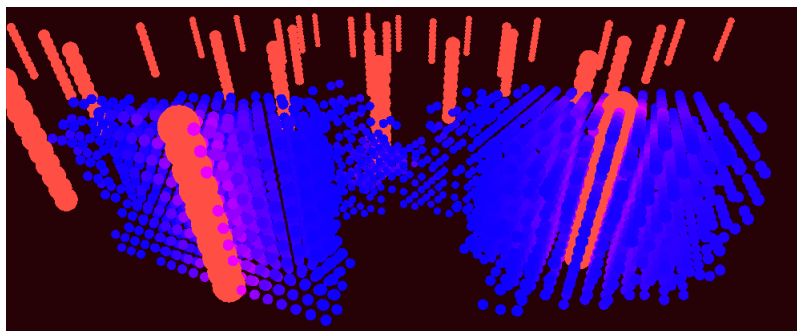

**Figure 3.** An example of a 3D on-lattice hybrid model of tumor cells spreading through tissue. The red vertical lines model vessels, and the blue dots model tumor cells. The cell color goes from pink to blue depending on how much oxygen is locally available. Displayed using the OpenGL3DWindow object.

### 3.2.3 PDEGrids

212

The PDE Grids consist of either a 1D, 2D, or 3D lattice of concentrations. PDE grids contain functions that will solve reaction-advection-diffusion equations. Solutions are facilitated by recording the next timestep values on a secondary swap lattice and then exchanging the identities of these lattices. Currently implemented PDE solution methods include:

213

214

215

216

217

- Explicit 1st Order Diffusion 218
- Modification of values at single lattice positions to facilitate reaction with agents or other sources/sinks. 219  
220
- ADI Diffusion [13] 221
- Explicit upwind 1st order Convection [14] 222

Most of these methods are flexible, allowing for variable diffusion rates and convection velocities as well as different boundary conditions such as periodic, Dirichlet, and zero-flux Von Neumann.

223

224

225

### 3.2.4 Graphical User Interface (Gui)

226

The Gui building system consists of the following components:

227

- UIWindow: a container for Gui sub-components which are added in columns that automatically scale to the appropriate size. The following four sub-components can be added: 228  
229  
230
  - UIGrid: a grid of pixels whose values are set individually. These are typically used to plot agent positions and diffusible concentrations, and can be easily output in GIF or PNG formats. 231  
232  
233
  - UILabel: a label that presents modifiable text. 234
  - UIButton: a button that executes a function when clicked 235
  - UIInputFields: fields that facilitate bounded input of Integers, Doubles, Strings, Booleans, File Creation/Selection, and Combo boxes 236  
237
- Window2DOpenGL/Window3DOpenGL: visualization windows that use OpenGL to efficiently render polygon graphics. 238  
239

- GridWindow: A shortcut to generate a UIWindow with a single UIGrid component embedded. This simple component is used in the results section example. 240-242
- GifMaker: An object that can turn UIGrid visualization snapshots into gifs (Original source code created by Patrick Meister [15]). 243-244

An example Gui that uses the UIWindow with embedded UIButtons, InputFields, UILabels, and a UIGrid is shown in Fig 4. 245-246

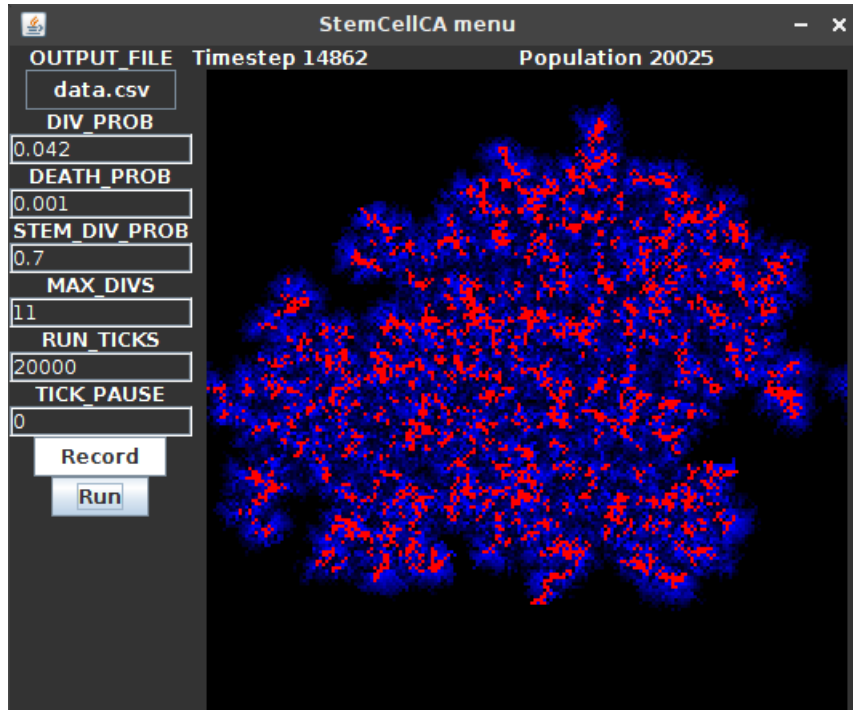

**Figure 4.** An example Gui. When the Run button is clicked, the visualization window displays a running model that is parameterized with the given settings. In this example model based on [16], the red cells are stem cells, and the blue cells are differentiated cells. Differentiated cells have a limited number of divisions and therefore can only spread a limited distance from the stem cells. Labels at the top of the Gui show the current timestep and population size. Displayed using the UIWindow object.

### 3.2.5 Utilities 247

The Util class is used with almost every project. It is a collection of standalone functions that solve common problems such as: Generating colors for use with the visualization tools, array manipulation, sampling distributions (eg. Gaussian, Poisson, Binomial, Multinomial - created using code pulled from the Colt and Numpy open source libraries [17, 18]), generating coordinate neighborhoods (eg. VonNeumann, Moore, Hex, Triangular), spatial mathematical operations, multicore parallelization, functions to save and load model states, etc. See the manual for more information 6. 248-254

### 3.2.6 Tools 255

A set of miscellaneous tool objects are included to help with specific modeling tasks, these include: 256-257



- A FileIO object that is used to read input files and output results. 258
- A GenomeTracker object that internally stores phylogeny information in a searchable tree structure. 259  
260

## 4 Results: Competitive Release Model 261

To demonstrate how the aforementioned principles and components of HAL are applied, 262  
we consider a simple but complete example of hybrid modeling. We implement the 263  
model of pulsed therapy based on a recent publication from the Anderson Lab [19]. We 264  
also showcase the flexibility that the modular component approach brings by displaying 265  
3 different parameterizations of the same model side by side. 266

### 4.1 Competitive Release Introduction 267

The model in [19] describes two competing tumor-cell phenotypes: a rapidly dividing, 268  
drug-sensitive phenotype and a slower dividing, drug-resistant phenotype. There is also 269  
a diffusible drug that enters the system through the domain boundaries and is up-taken 270  
by the tumor cells over time. 271

Every timestep (tick), each cell has a probability of death and a probability of 272  
division. The division probability is affected by phenotype and the availability of space. 273  
Sensitive cells have a death rate that increases when the cells are exposed to drug, while 274  
resistant cells have a constant death rate. 275

The modular design of HAL allows us to test 3 different treatment conditions, each 276  
with an identical starting tumor (No drug, constant drug, and pulsed drug). An 277  
interesting outcome of the experiment is that pulsed therapy is better at managing the 278  
tumor than constant therapy. Under pulsed therapy the sensitive population is kept in 279  
check, while still competing spatially with the resistant phenotype and preventing its 280  
expansion. The rest of the section describes in detail how this abstract model is 281  
generated. 282

Fig 5 provides a high level look at the structure of the code. Table 3 provides a 283  
quick reference for the built-in HAL functions in this example. Any functions that are 284  
used by the example but do not exist in the table are defined within the example itself 285  
and explained in detail below the code. Those fluent in Java may be able to understand 286  
the example just by reading the code and using the reference table. Built-in framework 287  
functions and classes used in the code are highlighted in red to make identifying 288  
framework components easier. 289

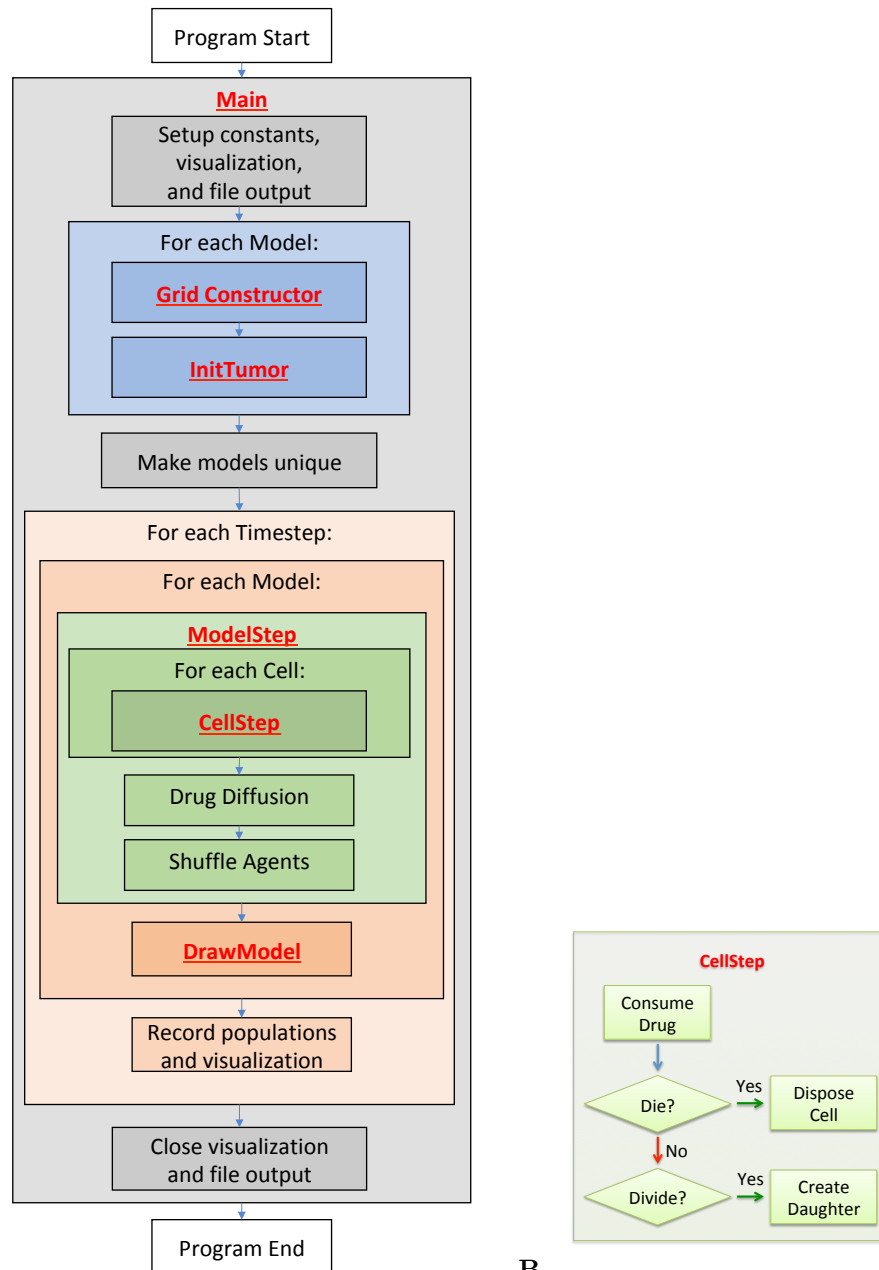

**A** **Figure 5.** (A) Example program flow diagram. Red font indicates where functions are first called. (B) CellStep function flow diagram.

| Function                            | Object      | Action                                                                                                                                                                                                                                                        |
|-------------------------------------|-------------|---------------------------------------------------------------------------------------------------------------------------------------------------------------------------------------------------------------------------------------------------------------|
| MapHood( NEIGHBORHOOD,X,Y)          | AgentGrid2D | Finds all indices in the provided neighborhood, centered around X,Y on the AgentGrid2D. Writes these indices into the NEIGHBORHOOD argument, and returns the number that were found.                                                                          |
| NewAgentSQ(INDEX)                   | AgentGrid2D | Returns a new agent, placed at the center of the of the square at the provided INDEX.                                                                                                                                                                         |
| ShuffleAgents(RNG)                  | AgentGrid2D | Usually called after every timestep to shuffle the order of agent iteration.                                                                                                                                                                                  |
| GetTick()                           | AgentGrid2D | Returns the current grid timestep.                                                                                                                                                                                                                            |
| ItoX(INDEX),<br>ItoY(INDEX)         | AgentGrid2D | Converts from a grid position INDEX to the x and y components that point to the same grid position.                                                                                                                                                           |
| G                                   | AgentSQ2D   | Gets the grid that the agent occupies.                                                                                                                                                                                                                        |
| Isq()                               | AgentSQ2D   | Gets the index of the grid square that the agent occupies.                                                                                                                                                                                                    |
| MapEmptyHood( NEIGHBORHOOD)         | AgentSQ2D   | Finds all indices in the provided neighborhood, centered around the agent, that do not have an agent occupying them. Writes these indices into the NEIGHBORHOOD argument, and returns the number that were found.                                             |
| Dispose()                           | AgentSQ2D   | Removes the agent from the grid and from iteration.                                                                                                                                                                                                           |
| Get(INDEX)                          | PDEGrid2D   | Returns the concentration of the PDE field at the given index.                                                                                                                                                                                                |
| Mul(INDEX, VALUE)                   | PDEGrid2D   | Multiplies the concentration at the given INDEX by VALUE.                                                                                                                                                                                                     |
| DiffusionADI( RATE)                 | PDEGrid2D   | Applies diffusion using the ADI method with the rate constant provided. A reflective boundary is assumed.                                                                                                                                                     |
| DiffusionADI( RATE, BOUNDARY_COND)  | PDEGrid2D   | Applies diffusion using the ADI method with the RATE constant provided. The BOUNDARY_COND value diffuses from the grid borders.                                                                                                                               |
| Update()                            | PDEGrid2D   | Applies all state changes simultaneously to the PDEGrid                                                                                                                                                                                                       |
| SetPix(INDEX, COLOR)                | GridWindow  | Sets the color of a pixel.                                                                                                                                                                                                                                    |
| TickPause( MILLISECONDS)            | GridWindow  | Pauses the program between calls to TickPause. The function automatically subtracts the time between calls from MILLISECONDS to ensure a consistent framerate.                                                                                                |
| ToPNG(FILENAME)                     | GridWindow  | Writes out the current state of the UIWindow to a PNG image file.                                                                                                                                                                                             |
| Close()                             | GridWindow  | Closes the GridWindow.                                                                                                                                                                                                                                        |
| RGB(RED, GREEN, BLUE)               | Util        | Returns an integer with the requested color in RGB format. This value can be used for visualization.                                                                                                                                                          |
| HeatMapRGB(VALUE)                   | Util        | Maps the VALUE argument (assumed to be between 0 and 1) to a color in the heat colormap.                                                                                                                                                                      |
| CircleHood( INCLUDE_ORIGIN, RADIUS) | Util        | Returns a set of coordinate pairs that define the neighborhood of all squares whose centers are within the RADIUS distance of the center (0,0) origin square. The INCLUDE_ORIGIN argument specifies whether to include the origin in this set of coordinates. |
| MooreHood( INCLUDE_ORIGIN)          | Util        | Returns a set of coordinate pairs that define a Moore neighborhood around the (0,0) origin square. The INCLUDE_ORIGIN boolean specifies whether we intend to include the origin in this set of coordinates.                                                   |
| Write(STRING)                       | FileIO      | Writes the STRING to the output file.                                                                                                                                                                                                                         |
| Close()                             | FileIO      | Closes the output file.                                                                                                                                                                                                                                       |

**Table 3.** HAL functions used in the example. Each function is a method of a particular object, meaning that when the function is called it can readily access properties that pertain to the object that it is called from.

## 4.2 Main Function

We first examine the 'main' function for a bird's-eye view of how the program is structured. Source code elements highlighted in red are built-in HAL functions and objects, and can be referenced in Table 3.

```
1     public static void main(String [] args) {
2         //setting up starting constants and data collection
3         int x = 100, y = 100, visScale = 5, tumorRad = 10, msPause = 0;
4         double resistantProb = 0.5;
5         GridWindow win = new GridWindow("Competitive Release", x * 3, y,
6             visScale);
7         FileIO popsOut = new FileIO("populations.csv", "w");
8         //setting up models
9         ExampleModel [] models = new ExampleModel [3];
10        for (int i = 0; i < models.length; i++) {
11            models[i] = new ExampleModel(x, y, new Rand());
12            models[i].InitTumor(tumorRad, resistantProb);
13        }
14        models[0].DRUG_DURATION = 0; //no drug
15        models[1].DRUG_DURATION = 200; //constant drug
16        //Main run loop
17        for (int tick = 0; tick < 10000; tick++) {
18            win.TickPause(msPause);
19            for (int i = 0; i < models.length; i++) {
20                models[i].ModelStep(tick);
21                models[i].DrawModel(win, i);
22            }
23            //data recording
24            popsOut.Write(models[0].GetPop() + ", " + models[1].GetPop() +
25                ", " + models[2].GetPop() + "\n");
26            if ((tick) % 100 == 0) {
27                win.ToPNG("ModelsTick" + tick + ".png");
28            }
29        }
30        //closing data collection
31        popsOut.Close();
32        win.Close();
33    }
```

**3-4:** Defines all of the constants that will be needed to setup the model and display.

**5:** Creates a GridWindow of RGB pixels for visualization and for generating timestep PNG images.  $x*3$ ,  $y$  define the dimensions of the pixel grid.  $X$  is multiplied by 3 so that 3 models can be visualized side by side in the same window. The last argument is a scaling factor that specifies that each pixel on the grid will be viewed as a  $5 \times 5$  square of pixels on the screen.

**6:** Creates a file output object to write to a file called populations.csv

**8:** Creates an array with 3 entries that will be populated with models.

**9-12:** Fills the model list with models that are initialized identically. Each model will hold and update its own cells and diffusible drug. See the Grid Definition and Constructor section and the InitTumor Function section for more details.

**13-14:** Setting the DRUG\_DURATION constant creates the only difference in the 3 models being compared. In models[0] no drug is administered (the default value of DRUG\_DURATION is 0). In models[1] drug administration is constant (DRUG\_DURATION is set equal to DRUG\_CYCLE). In models[2] drug will be administered periodically. See the ExampleModel Constructor and Properties section for the default values.

- 16: Executes the main loop for 10000 timesteps. See the ModelStep Function for where the Model timestep is incremented. 346  
347
- 17: Requires every iteration of the loop to take a minimum number of milliseconds. This slows down the execution and display of the model and makes it easier for the viewer to follow. 348  
349  
350
- 18: Loops over all models to update them. 351
- 19: Advances the state of the agents and diffusibles in each model by one timestep. See the Model Step Function for more details. 352  
353
- 20: Draws the current state of each model to the window. See the Draw Model Function for more details. 354  
355
- 23: Writes the population sizes of each model every timestep to allow the models to be compared. 356  
357
- 24: Every 100 timesteps, writes the state of the model as captured by the GridWindow to a PNG file. 358  
359
- 29-30: After the main for loop has finished, the FileIO object and the visualization window are closed, and the program ends. 360  
361

### 4.3 ExampleModel Constructor and Properties 362

This section explains how the grid is defined and instantiated. 363

```
1 public class ExampleModel extends AgentGrid2D<ExampleCell> { 364
2     //model constants 365
3     public final static int RESISTANT = RGB(0, 1, 0), SENSITIVE = RGB(0, 366
4         0, 1); 367
5     public double DIV_PROB_SEN = 0.025, DIV_PROB_RES = 0.01, 368
6         DEATH_PROB = 0.001, DRUG_DIFF_RATE = 2, DRUG_UPTAKE = 0.91, 369
7         DRUG_TOXICITY = 0.2, DRUG_BOUNDARY_VAL = 1.0; 370
8     public int DRUG_START = 400, DRUG_CYCLE = 200, DRUG_DURATION = 40; 371
9     //internal model objects 372
10    public PDEGrid2D drug; 373
11    public Rand rng; 374
12    public int[] divHood = MooreHood(false); 375
13    public ExampleModel(int x, int y, Rand generator) { 376
14        super(x, y, ExampleCell.class); 377
15        rng = generator; 378
16        drug = new PDEGrid2D(x, y); 379
17    } 380  
381  
382
```

- 1: The ExampleModel class, which is user defined and specific to this example, is built by extending the generic AgentGrid2D class. The extended grid class requires an agent type parameter, which is the type of agent that will live on the grid. To meet this requirement, the <ExampleCell> type parameter is added to the declaration. 384  
385  
386  
387  
388
- 3: Defines RESISTANT and SENSITIVE constants, which are created by the Util RGB function. These constants serve as both colors for drawing and as labels for the different cell types. 389  
390  
391
- 4-7: Defines all constants that will be needed during the model run. These values can be reassigned after model creation to facilitate testing different parameter settings. In the main function, the DRUG\_DURATION variable is modified for the Constant-Drug, and Pulsed Therapy experiment cases. 392  
393  
394  
395

- 9:** Declares that the model will contain a PDEGrid2D, which will hold the drug concentrations. The PDEGrid2D can only be initialized when the x and y dimensions of the model are known, which is why we do not define them until the constructor function. 396-399
- 10:** Declares that the Grid will contain a Random number generator, but take it in as a constructor argument to allow the modeler to seed it if desired. 400-401
- 11:** Defines an array that will store the coordinates of a neighborhood generated by the MooreHood function. The MooreHood function generates a set of coordinates that define the Moore Neighborhood, centered around the (0,0) origin. The neighborhood is stored in the format  $[0_1 0_2, \dots, 0_n, x_1, y_1, x_2, y_2, \dots, x_n, y_n]$ . The leading zeros are written to when MapHood is called, and will store the indices that the neighborhood maps to. See the CellStep function for more information. 402-407
- 13:** Defines the model constructor, which takes as arguments the x and y dimensions of the world and a random number generator. 408-409
- 14:** Calls the AgentGrid2D constructor with super, passing it the x and y dimensions of the world, and the ExampleCell Class. This Class is used by the Grid to generate a new cell when the NewAgentSQ function is called. 410-412
- 15-16:** The random number generator argument is assigned and the drug PDEGrid2D is defined with matching dimensions. 413-414

#### 4.4 InitTumor Function 415

```
1 public void InitTumor(int radius, double resistantProb) { 416
2     //get a list of indices that fill a circle at the center of the 417
3     grid 418
4     int[] tumorNeighborhood = CircleHood(true, radius); 419
5     int hoodSize = MapHood(tumorNeighborhood, xDim / 2, yDim / 2); 420
6     for (int i = 0; i < hoodSize; i++) { 421
7         if (rng.Double() < resistantProb) { 422
8             NewAgentSQ(tumorNeighborhood[i]).type = RESISTANT; 423
9         } else { 424
10            NewAgentSQ(tumorNeighborhood[i]).type = SENSITIVE; 425
11        } 426
12    } 427
13 } 428
14 } 438
```

The next segment of code is a function from the ExampleModel class that defines how the tumor is first seeded after the ExampleModel is created. 431-432

- 1:** The arguments passed to the InitTumor function are the approximate radius of the circular tumor being created and the probability that each created cell will be of the resistant phenotype. 433-435
- 3:** Sets the circleCoords array using the built-in CircleHood function, which stores coordinates in the form  $[0_1, 0_2, \dots, 0_n, x_1, y_1, x_2, y_2, \dots, x_n, y_n]$ . These coordinate pairs define a neighborhood of all squares whose centers are within the radius distance of the center (0,0) origin square. The leading 0s are used by the MapHood function to store the mapped indices. The boolean argument specifies that the origin will be included in this set of squares, thus making a completely filled circle of squares. 436-442
- 4:** Uses the built-in MapHood function to map the neighborhood defined above to be centered around xDim/2,yDim/2 (the dimensions of the AgentGrid). The results 443-444

of the mapping are written as indices to the beginning of the tumorNeighborhood array. MapHood returns the number of valid indices found, and this will be the size of the starting population.

- 5: Loops from 0 to hoodSize, allowing access to each mapped index in the tumorNeighborhood.
- 6: Samples a random number in the range (0 – 1] and compares to the resistantProb argument to set whether the cell should have the resistant phenotype or the sensitive phenotype.
- 7-9: Uses the built-in NewAgentSQ function to place a new cell at each tumorNeighborhood position. In the same line we also specify that the phenotype should be either resistant or sensitive, depending on the result of the rng.Double() call.

#### 4.5 ModelStep Function

This section looks at the model's step function which is executed once per timestep by each Model.

```
1 public void ModelStep(int tick) {  
2     ShuffleAgents(rng);  
3     for (ExampleCell cell : this) {  
4         cell.CellStep();  
5     }  
6     int periodTick = (tick - DRUG_START) % DRUG_CYCLE;  
7     if (periodTick > 0 && periodTick < DRUG_DURATION) {  
8         //drug will enter through boundaries  
9         drug.DiffusionADI(DRUG_DIFF_RATE, DRUG_BOUNDARY_VAL);  
10    } else {  
11        //drug will not enter through boundaries  
12        drug.DiffusionADI(DRUG_DIFF_RATE);  
13    }  
14    drug.Update()  
15 }
```

- 2: The ShuffleAgents function randomizes the order of iteration so that the agents are always looped through in random order.
- 3-4: Iterates over every cell on the grid, and calls the CellStep function on every cell.
- 6-7: The GetTick function is a built-in function that returns the current Grid timestep. The If statement logic checks if the timestep is past the drug start and if the timestep is in the right part of the drug cycle to apply drug. (See the Grid Definition and Constructor section for the values of the constants involved, the DRUG\_DURATION variable is set differently for each model in the Main Function)
- 9: If it is time to add drug to the model, the built-in DiffusionADI function is called. The default Diffusion function uses the standard 2D Laplacian and is of the form:  $\frac{\delta C}{\delta t} = D\nabla^2 C$ , where D in this case is the DRUG\_DIFF\_RATE. DiffusionADI uses the ADI method which is more stable and allows us to take larger steps. The additional argument to the DiffusionADI function specifies the boundary condition value DRUG\_BOUNDARY\_VAL. This causes the drug to diffuse into the PDEGrid2D from the boundary. Here we assume that drug is only delivered from the boundaries of the domain

12: Without the second argument the DiffusionADI function assumes a no-flux boundary, meaning that drug concentration cannot escape or enter through the sides. Therefore the only way for the drug concentration to decrease is via uptake by the Cells. See the CellStep function section, line 6, for more information.

14: Update is called to apply the reaction and diffusion changes to the PDEGrid.

## 4.6 CellStep Function and Cell Properties

We next look at how the ExampleCell Agent is defined and at the CellStep function that runs once per Cell per timestep.

```
1 class ExampleCell extends AgentSQ2Dunstackable<ExampleModel> {
2     public int type;
3
4     public void CellStep() {
5         //uptake of Drug
6         G.drug.Mul(Isq(), G.DRUG_UPTAKE);
7         double deathProb, divProb;
8         //Chance of Death, depends on resistance and drug concentration
9         if (this.type == RESISTANT) {
10            deathProb = G.DEATH_PROB;
11        } else {
12            deathProb = G.DEATH_PROB + G.drug.Get(Isq()) *
13                G.DRUG_TOXICITY;
14        }
15        if (G.rng.Double() < deathProb) {
16            Dispose();
17            return;
18        }
19        //Chance of Division, depends on resistance
20        if (this.type == RESISTANT) {
21            divProb = G.DIV_PROB_RES;
22        } else {
23            divProb = G.DIV_PROB_SEN;
24        }
25        if (G.rng.Double() < divProb) {
26            int options = MapEmptyHood(G.divHood);
27            if (options > 0) {
28                G.NewAgentSQ(G.divHood[G.rng.Int(options)]).type =
29                    this.type;
30            }
31        }
32    }
33 }
```

1: The ExampleCell class is built by extending the generic AgentSQ2Dunstackable class. The extended Agent class requires the ExampleModel class as a type argument, which is the type of Grid that the Agent will live on. To meet this requirement, we add the <ExampleModel> type parameter to the extension.

2: Defines a cell property called 'type'. Each Cell holds a value for this field. If the value is RESISTANT, the Cell is of the resistant phenotype, if the value is SENSITIVE, the cell is of the sensitive phenotype. The RESISTANT and SENSITIVE constants are defined in the ExampleGrid as constants.

6: The G function is used to access the ExampleGrid object that the Cell lives on. G is used often with Agent functions as the AgentGrid is expected to contain any information that is not local to the Cell itself. Here it is used to get the drug PDEGrid2D. The drug concentration at the index that the Cell is currently



occupying (Isq()) is then multiplied by the drug uptake constant, thus modeling local drug uptake by the Cell.

- 7:** Defines deathProb and divProb variables, these will be assigned different values depending on whether the ExampleCell is RESISTANT or SENSITIVE.
- 9-12:** If the cell is resistant, the deathProb variable is set to the DEATH\_PROB value alone, if the cell is sensitive, an additional term is added to account for the probability of the cell dying from drug exposure, using the concentration of drug at the cell's position (Isq())
- 14-16:** Samples a random number in the range (0 – 1] and compares to deathProb to determine whether the cell will die. If so, the built-in agent Dispose() function is called, which removes the agent from the grid, and then return is called so that the dead cell will not divide.
- 19-22:** Sets the divProb variable to either DIV\_PROB\_RES for resistant cells, or DIV\_PROB\_SEN for sensitive cells.
- 24:** Samples a random number in the range (0 – 1] and compares to divProb to determine whether the cell will divide.
- 25:** If the cell divides, the built-in MapEmptyHood function is used which displaces the divHood (the Moore neighborhood as defined in the Grid Definition and Constructor section) to be centered around the x and y coordinates of the Cell, and writes the empty indices into the neighborhood. The MapEmptyHood function will only map indices in the neighborhood that are empty. MapEmptyHood returns the number of valid division options found.
- 26-27:** If there are one or more valid division options, a new daughter cell is created using the built-in NewAgentSQ function and its starting location is chosen by randomly sampling the divHood array to pull out one if its valid locations. Finally with the .type=this.type statement, the phenotype of the new daughter cell is set to the phenotype of the pre-existing daughter that remains in place, thus maintaining phenotypic inheritance.

## 4.7 DrawModel Function

We next look at the DrawModel Function, which is used to display a summary of the model state on a GridWindow object. In this program, DrawModel is called once for each model per timestep; see the Main Function section for more information.

```
1     public void DrawModel(GridWindow vis , int iModel) {
2         for (int x = 0; x < xDim; x++) {
3             for (int y = 0; y < yDim; y++) {
4                 ExampleCell drawMe = GetAgent(x, y);
5                 if (drawMe != null) {
6                     vis.SetPix(x + iModel * xDim, y, drawMe.type);
7                 } else {
8                     vis.SetPix(x + iModel * xDim, y,
9                         HeatMapRGB(drug.Get(x, y)));
10                }
11            }
12        }

```

- 2-3:** Loops over every lattice position of the grid being drawn, xDim and yDim refer to the dimensions of the model.

**4:** Uses the built-in GetAgent function to get the Cell that is at the x,y position. 598

**5-6:** If a cell exists at the requested position, the corresponding pixel on the 599  
GridWindow is set to the cell's phenotype color. To draw the models side by side, 600  
the pixel being drawn is displaced to the right by the model index. 601

**7-8:** If there is no cell to draw, then the pixel color is set based on the drug 602  
concentration at the same index, using the built-in heat colormap. 603

## 4.8 Imports 604

The final code snippet looks at the imports that are needed. Any modern Java IDE 605  
should generate import statements automatically. 606

---

```
1 package Examples._6CompetitiveRelease; 607
2 import Framework.GridsAndAgents.AgentGrid2D; 608
3 import Framework.GridsAndAgents.PDEGrid2D; 609
4 import Framework.Gui.GridWindow; 610
5 import Framework.GridsAndAgents.AgentSQ2Dunstackable; 611
6 import Framework.Tools.FileIO; 612
7 import Framework.Rand; 613
8 import static Examples._6CompetitiveRelease.ExampleModel.*; 614
9 import static Framework.Util.*; 615
```

---

616

**1:** The package statement specifies where the file exists in the larger project structure 618

**2-7:** Imports all of the classes that we will need for the program. 619

**8:** Imports the static fields of the model so that we can use the type names defined 620  
there in the Agent class. 621

**9:** Imports the static functions of the Util file, which adds all of the Util functions to 622  
the current namespace, so we can natively call them. Statically importing Util is 623  
recommended for every project. 624

## 4.9 Model Results 625

Fig 4 displays the model visualization at timestep 0, timestep 400, timestep 1100, 626  
timestep 5500, and timestep 10,000. The caption explores the notable trends visible in 627  
each image. Fig 6 displays the population sizes as recorded by the FileIO object at the 628  
end of every timestep. 629

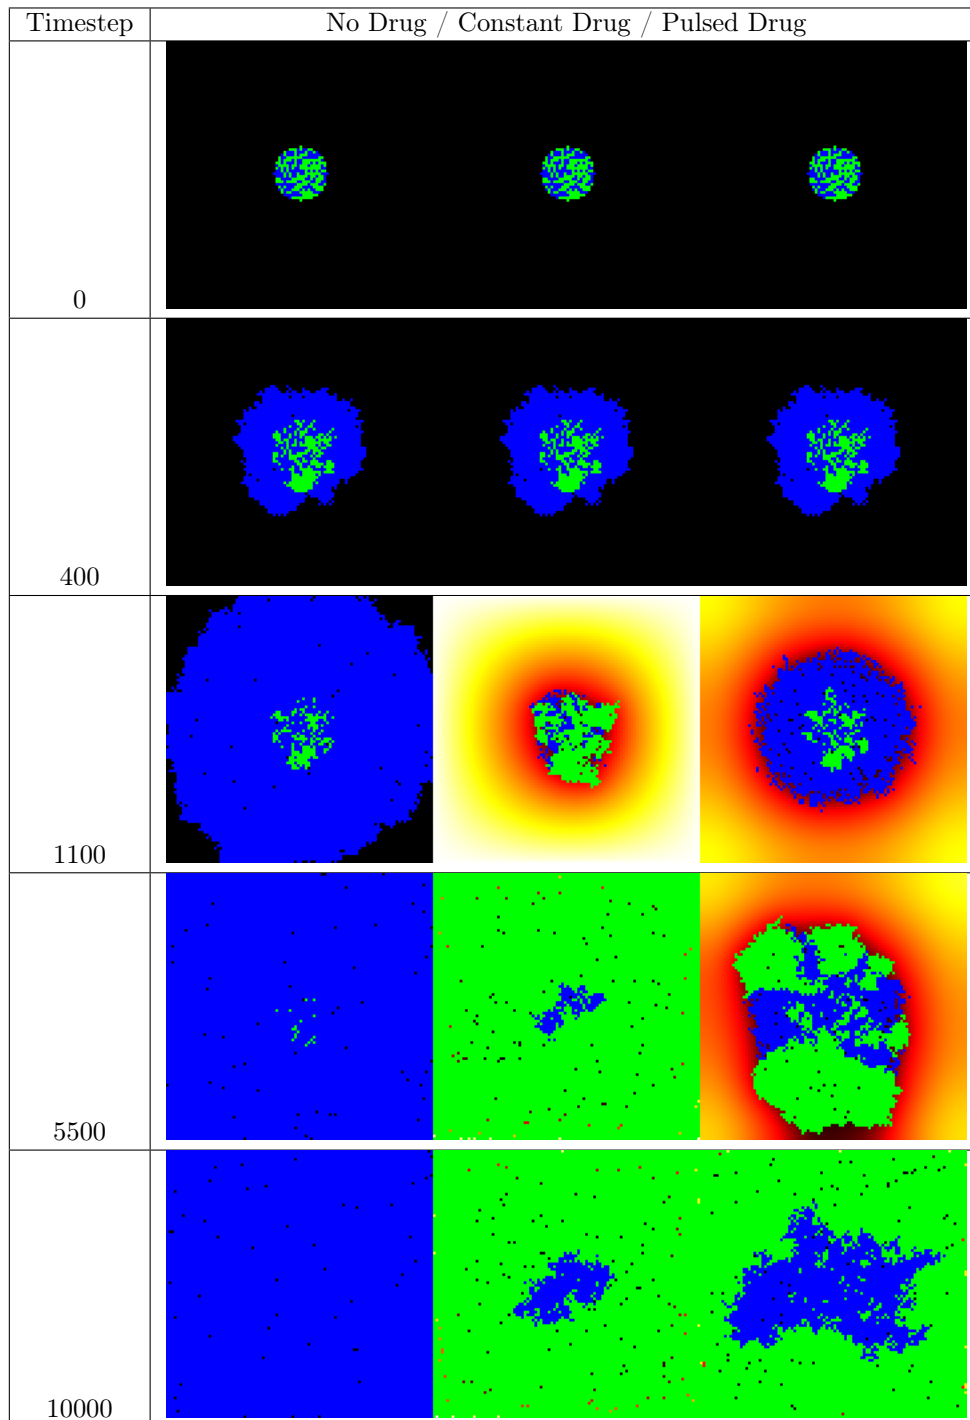

**Table 4.** Selected model visualization PNGs. Blue cells are drug sensitive, Green cells are drug resistant, background heatmap colors show drug concentration.

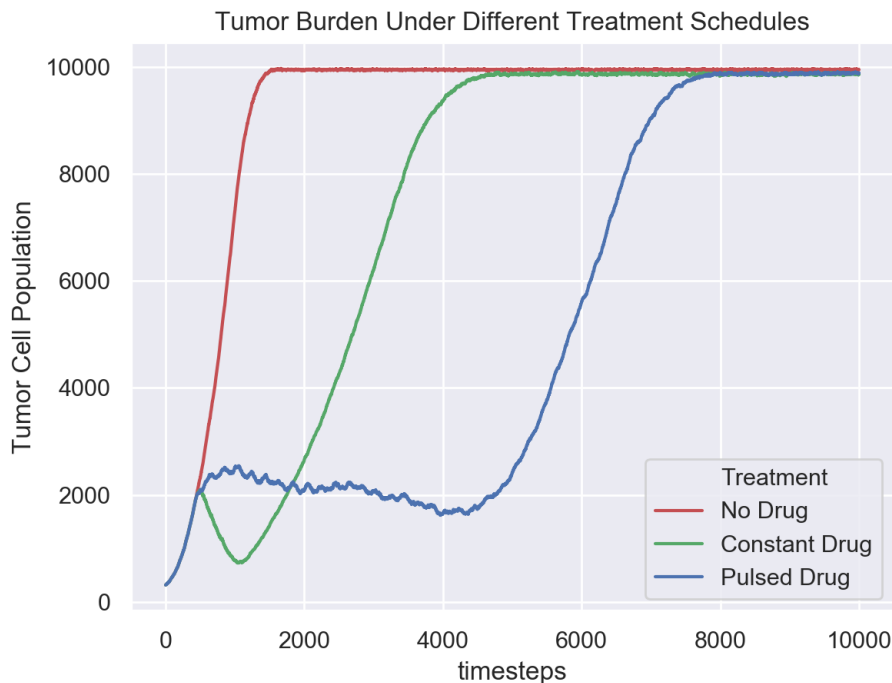

**Figure 6.** FileIO population output. This plot summarizes the changes in tumor burden over time for each model. This plot was constructed in python using data accumulated in the program output csv file. Displayed using Seaborn with Python

This modeling example illustrates the power of HAL’s approach to model building. Writing relatively little complex code, we setup a 3 model experiment with nontrivial dynamics along with methods to collect data and visualize the models. We now briefly review the model results.

As can be seen in Fig 6, at timestep 0 and timestep 400 (right before drug application starts), all 3 models are identical. At timestep 1100 the differences in treatment application show different effects: when no drug is applied, the rapidly dividing sensitive cells quickly fill the domain, while when drug is applied constantly, the resistant cells overtake the tumor. Pulsed drug kills some sensitive cells, but leaves enough alive to prevent growth of the resistant cells. At timestep 5500, the resistant cells have begun to emerge from the center of the pulsed drug model. At timestep 10000, all domains are filled. Interestingly, the sensitive cells are able to survive in the center of the domain because drug is consumed by cells on the outside. This creates a drug-free zone in which the sensitive cells out-compete the resistant cells.

As can be seen in Table 4, the pulsed therapy is the most effective at preventing tumor growth, however the resistant cells ultimately succeed in breaking out of the tumor center and out-competing the sensitive cells on the fringes of the tumor. It may be possible to maintain a homeostatic population of sensitive and resistant cells for longer by using a different pulsing schedule or by modifying the treatment schedule in response to the tumor growth (adaptive therapy). As the presented model is primarily an example, we do not explore how to improve treatment further. For a more detailed exploration of the potential of adaptive therapy for prolonging competitive release, see [19].

## 5 Availability And Future Directions 653

### 5.1 How to Download and Contribute 654

HAL is publicly available on GitHub, at <https://github.com/torococo/HAL>. A manual is included that walks the user through installation and serves as a coding reference. There is a long list of issues to be addressed on the Github page, only some of which are discussed in the next section. Contributors can tackle these or share generalized solutions to any modeling problems that they encounter by sending pull requests to the repository.

### 5.2 Future Directions 661

#### 5.2.1 Additional agent-based Modeling Paradigms 662

Currently the only paradigm implemented on top of the base agent types are the SphericalAgent2D/3D extension classes, which facilitate modeling cells as spheres with force vectors. In the future we hope to incorporate additional modeling paradigms that are commonly used in agent-based modeling of cells. An expected addition is a Delaunay Agent type, which will use Delaunay tessellation [20] to find the cell's nearest neighbors and determine their volume. We are also considering including modeling paradigms that construct cells out of smaller subunits, such as Deformable Ellipsoid Cell Modeling [21], as it would allow us to model the mechanics of tissue formation and migration in more detail.

#### 5.2.2 Cross Model Validation 672

Having many different paradigms to choose from adds several complications to modeling: It can take significant effort to build a model from scratch under one paradigm, and then significant additional effort to migrate the model to a different paradigm. By adding more modeling approaches with a consistent interface, HAL will lower the model migration barrier and allow modelers to test the merits of many paradigms in their investigation, and to validate their results by seeing whether they hold true across paradigms. Note that our goal is not to recreate all of the functionality of the pre-existing frameworks that support these paradigms, it is to provide their core algorithms so that users can compare and choose from among them.

#### 5.2.3 Bridging Spatial Scales 682

We also hope to explore the possibility of changing spatial scales for both our PDEs and Agents. For PDEs, this is a readily understood problem, and we intend to add scalable PDEGrids to HAL soon. However, for agent-based modeling the process of changing scales while preserving dynamics is not so well defined, though we imagine that it may be possible under certain assumptions. This would be useful for helping us bridge the divide between cell level and tissue/organ/tumor level dynamics, as the number of cells involved at these scales are orders of magnitude greater than what desktop machines can tractably model.

#### 5.2.4 Assumption Modules 691

A common modeling task is exploring how combinations of different assumptions influence model behavior. A planned abstraction that will improve how models are built incrementally will be the inclusion of a system for separating model design assumptions into assumption modules. This design entails providing code "hooks" into specific agent

decisions and model events, (eg. whether an agent will reproduce). Modelers can then write assumption modules that will influence these events (eg. by altering the probability of reproduction based on an environmental factor that would otherwise be ignored).

This approach allows modelers to combine and remove assumption modules without having to worry about breaking the model. This facilitates easy exploration of the space of assumptions until ones suitable for understanding biological phenomena are found.

### 5.2.5 Advanced Scheduling

Taking inspiration from Repast, SWARM, and MASON, another expected extension is the inclusion of optional schedulers to facilitate more complex methods of iterating through agents than simply looping over each grid. This is not intended to replace the simple grid iteration approach, but instead should augment it with optional complex methods. An AgentList class is currently included to begin to address this. It allows modelers to make selective lists of agents for more flexible iteration.

### 5.2.6 Building a Community

HAL has already seen adoption within the labs at the Integrated Mathematical Oncology department of Moffitt Cancer Center. We certainly hope that outside users will also be interested in its potential. As the user-base for HAL grows, we plan to extend the base of resources around the platform. The current set of resources that exist for new users to get started are the manual 6, a website with an online version of the manual [1] and a playlist of YouTube videos [22]. We intend to increase HAL's online presence, by moving the manual to an online searchable format, as well as including a website with a code repository to make sharing models and tools easier.

## 6 Conclusion

Cancer is a complex and heterogeneous disease whose mathematical study is still being developed. To make better progress in this endeavor, it is helpful to have a set of highly generic tools that encapsulate the key components of spatial modeling so that researchers can produce efficient models without being constrained in their approach, nor in the complexity of the systems that they can produce. HAL is our attempt to achieve this.

HAL was made easily extensible so that researchers can build models and more specific tools on top of HAL's generic base. The hope is that by this process HAL will grow into a powerful toolset that will help standardize and coordinate hybrid modeling in mathematical oncology.

We recommend HAL to anyone building spatial models for oncology, as the tools presented are primarily geared toward this end. However, given the amount of overlap and cross talk between the approaches used in different modeling applications, we hope that modelers outside of mathematical oncology will also take interest and contribute, to our mutual benefit.

## Supporting information

**S1 Fig. HAL (Hybrid Automata Library) Manual.** Includes setup instructions, implementation details, and a function glossary.

## References

1. Jefferey West RB. Hybrid Automata Library; 2018. Available from: <https://halloworld.org>.
2. Rejniak KA, Anderson AR. Hybrid models of tumor growth. Wiley Interdisciplinary Reviews: Systems Biology and Medicine. 2011;3(1):115–125.
3. Basanta D, Anderson A. Homeostasis Back and Forth: An Eco-Evolutionary Perspective of Cancer. bioRxiv. 2016; p. 092023.
4. Anderson AR. A hybrid mathematical model of solid tumour invasion: the importance of cell adhesion. Mathematical medicine and biology: a journal of the IMA. 2005;22(2):163–186.
5. Anderson AR, Chaplain M. Continuous and discrete mathematical models of tumor-induced angiogenesis. Bulletin of mathematical biology. 1998;60(5):857–899.
6. Ghaffarizadeh A, Friedman SH, Macklin P. Agent-based simulation of large tumors in 3-D microenvironments. bioRxiv. 2015; p. 035733.
7. Swat MH, Thomas GL, Belmonte JM, Shirinifard A, Hmeljak D, Glazier JA. Multi-scale modeling of tissues using CompuCell3D. Methods in cell biology. 2012;110:325.
8. Mirams GR, Arthurs CJ, Bernabeu MO, Bordas R, Cooper J, Corrias A, et al. Chaste: an open source C++ library for computational physiology and biology. PLoS computational biology. 2013;9(3):e1002970.
9. Collier N. Repast: An extensible framework for agent simulation. The University of Chicagos Social Science Research. 2003;36:2003.
10. Luke S, Cioffi-Revilla C, Panait L, Sullivan K. Mason: A new multi-agent simulation toolkit. In: Proceedings of the 2004 swarmfest workshop. vol. 8. Department of Computer Science and Center for Social Complexity, George Mason University Fairfax, VA; 2004. p. 316–327. Available from: <http://cobweb.cs.uga.edu/~maria/pads/papers/mason-SwarmFest04.pdf>.
11. Tisue S, Wilensky U. Netlogo: A simple environment for modeling complexity. In: International conference on complex systems. vol. 21. Boston, MA; 2004. p. 16–21. Available from: <https://ccl.northwestern.edu/papers/netlogo-iccs2004.pdf>.
12. Anderson A, Sleeman B, Young I, Griffiths B. Nematode movement along a chemical gradient in a structurally heterogeneous environment: 2. Theory. Fundamental and applied nematology. 1997;20(2):165–172.
13. Peaceman DW, Rachford HH Jr. The numerical solution of parabolic and elliptic differential equations. Journal of the Society for industrial and Applied Mathematics. 1955;3(1):28–41.
14. Courant R, Isaacson E, Rees M. On the solution of nonlinear hyperbolic differential equations by finite differences. Communications on Pure and Applied Mathematics. 1952;5(3):243–255.
15. Meister P. gifAnimation processing library; 2015. Available from: <https://github.com/extrapixel/gif-animation>.

16. Poleszczuk J, Macklin P, Enderling H. Agent-based modeling of cancer stem cell driven solid tumor growth. In: Stem Cell Heterogeneity. Springer; 2016. p. 335–346.
17. Oliphant TE. A guide to NumPy. vol. 1. Trelgol Publishing USA; 2006.
18. CERN. Colt; 2004. Available from: <http://dst.lbl.gov/ACSSoftware/colt/>.
19. Gallaher JA, Enriquez-Navas PM, Luddy KA, Gatenby RA, Anderson AR. Adaptive vs continuous cancer therapy: Exploiting space and trade-offs in drug scheduling. bioRxiv. 2017;.
20. Bock M, Tyagi AK, Kreft JU, Alt W. Generalized voronoi tessellation as a model of two-dimensional cell tissue dynamics. Bulletin of mathematical biology. 2010;72(7):1696–1731.
21. Alexander Anderson KR Mark A J Chaplain. Single-Cell-Based Models in Biology and Medicine. illustrated ed. Springer Science & Business Media; 2007.
22. Bravo R. HAL Tutorial 1: Setup; 2018. Available from: <https://www.youtube.com/watch?v=yjTmH3qORFQ&t=43s>.

## Acknowledgements

This work was possible through the generous support of NIH funding, Anderson and Robertson-Tessi acknowledge NCI U54CA193489, Anderson and Bravo acknowledge NCI UH2CA203781.
